# Supplementary material for: Whole Genome Sequencing and Molecular Analysis of Carbapenemase-Producing Escherichia coli from Intestinal Carriage in Elderly Inpatients
Source: MDPI journal article supplement (doi:10.3390/microorganisms10081561), 2022-08-03
Supplement: s1 [file s1]

**Supplementary Table S1. Matrix of core genome single nucleotide polymorphisms (SNPs) between *E. coli* isolates from the elderly.**

|           | MI3.2.1 | MI4.1.1 | MI4.14.1 | MI4.15.1 | MI5.18.1 | MI5.4.1 | MI5.8.1 | reference | RM18.1 | RM32.1 | RM38.1 | RM52.1 | RM70.1 |
|-----------|---------|---------|----------|----------|----------|---------|---------|-----------|--------|--------|--------|--------|--------|
| MI3.2.1   | 0       | 21      | 45394    | 21787    | 41026    | 20907   | 39304   | 20478     | 23720  | 60     | 44903  | 44829  | 39837  |
| MI4.1.1   | 21      | 0       | 45402    | 21795    | 41039    | 20912   | 39316   | 20485     | 23727  | 59     | 44911  | 44837  | 39845  |
| MI4.14.1  | 45394   | 45402   | 0        | 42987    | 41088    | 41491   | 46672   | 39480     | 44868  | 45401  | 16907  | 22569  | 46770  |
| MI4.15.1  | 21787   | 21795   | 42987    | 0        | 38884    | 13517   | 37576   | 11920     | 19401  | 21790  | 42514  | 42505  | 38279  |
| MI5.18.1  | 41026   | 41039   | 41088    | 38884    | 0        | 37698   | 36485   | 35792     | 40884  | 41036  | 40941  | 41500  | 35911  |
| MI5.4.1   | 20907   | 20912   | 41491    | 13517    | 37698    | 0       | 35845   | 6773      | 17139  | 20909  | 41126  | 40990  | 37017  |
| MI5.8.1   | 39304   | 39316   | 46672    | 37576    | 36485    | 35845   | 0       | 34372     | 39498  | 39315  | 46233  | 46936  | 28856  |
| reference | 20478   | 20485   | 39480    | 11920    | 35792    | 6773    | 34372   | 0         | 17829  | 20484  | 39184  | 39130  | 35198  |
| RM18.1    | 23720   | 23727   | 44868    | 19401    | 40884    | 17139   | 39498   | 17829     | 0      | 23720  | 44332  | 44302  | 39995  |
| RM32.1    | 60      | 59      | 45401    | 21790    | 41036    | 20909   | 39315   | 20484     | 23720  | 0      | 44910  | 44838  | 39848  |
| RM38.1    | 44903   | 44911   | 16907    | 42514    | 40941    | 41126   | 46233   | 39184     | 44332  | 44910  | 0      | 21914  | 46614  |
| RM52.1    | 44829   | 44837   | 22569    | 42505    | 41500    | 40990   | 46936   | 39130     | 44302  | 44838  | 21914  | 0      | 46916  |
| RM70.1    | 39837   | 39845   | 46770    | 38279    | 35911    | 37017   | 28856   | 35198     | 39995  | 39848  | 46614  | 46916  | 0      |
